# Supplementary material for: Single-molecule visualization of ROS-induced DNA damage in large DNA molecules
Source: Royal Society of Chemistry journal article supplement (doi:10.1039/c5an01875g), 2015-12-02
Supplement: c5an01875g1.pdf [file c5an01875g1.pdf]

## Supporting information for

# Single-Molecule Visualization of ROS-induced DNA Damage in Large DNA Molecules

Jinyong Lee,<sup>a</sup> Yongkyun Kim,<sup>a</sup> Sangyong Lim<sup>b</sup> and Kyubong Jo<sup>\*,a</sup>

*in silico* sequence frequency map and damage frequency map.

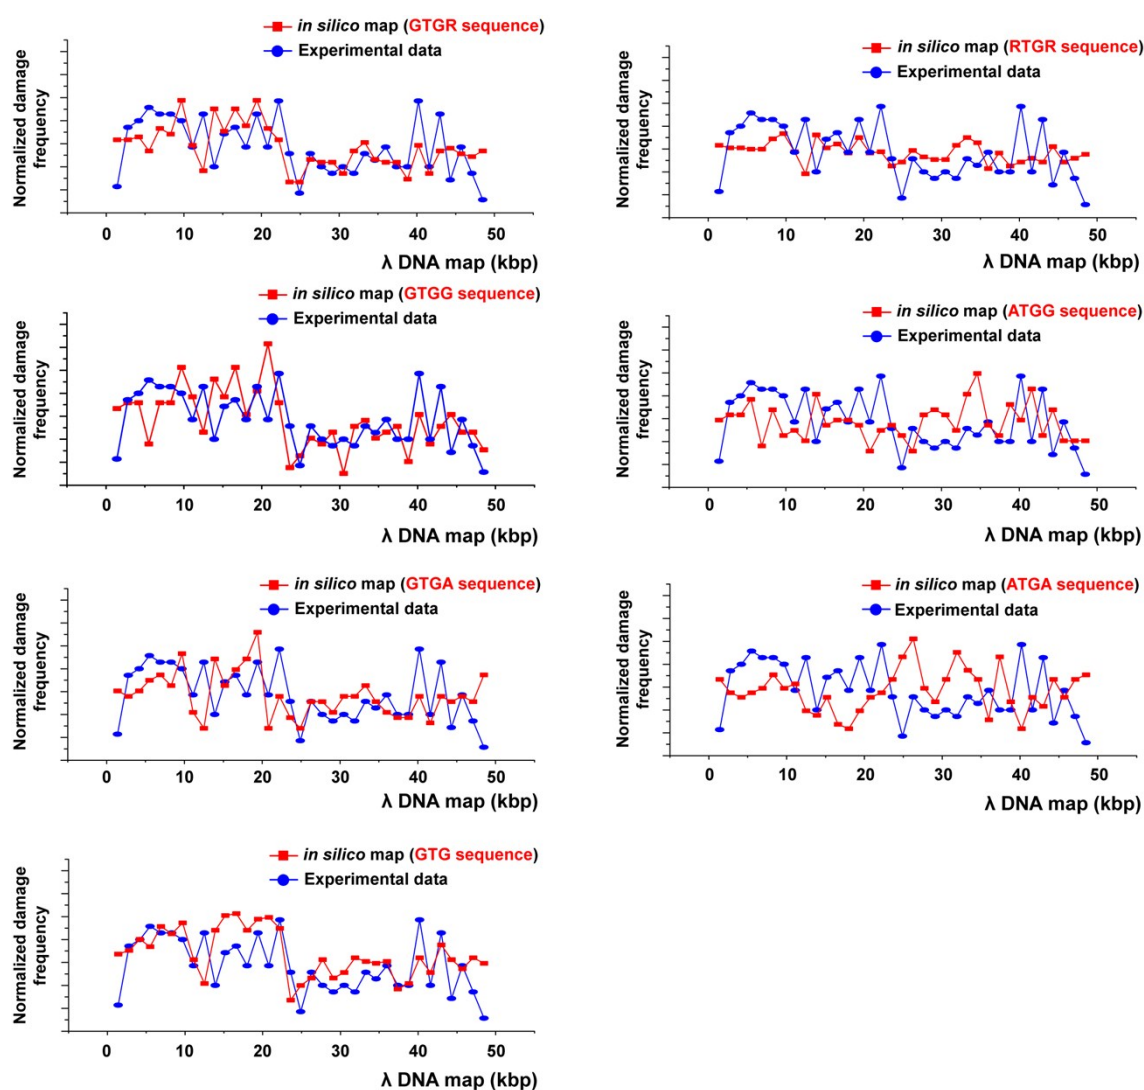

Figure 1 Comparison of *in silico* sequence frequency map (■) and damage frequency map (●)
